# Supplementary material
Source: MDPI journal article supplement (https://www.mdpi.com/2073-4395/12/12/2927)
Supplement: s1 [file s1 › agronomy-1960009-supplementary.pdf]

# Supplementary Materials:

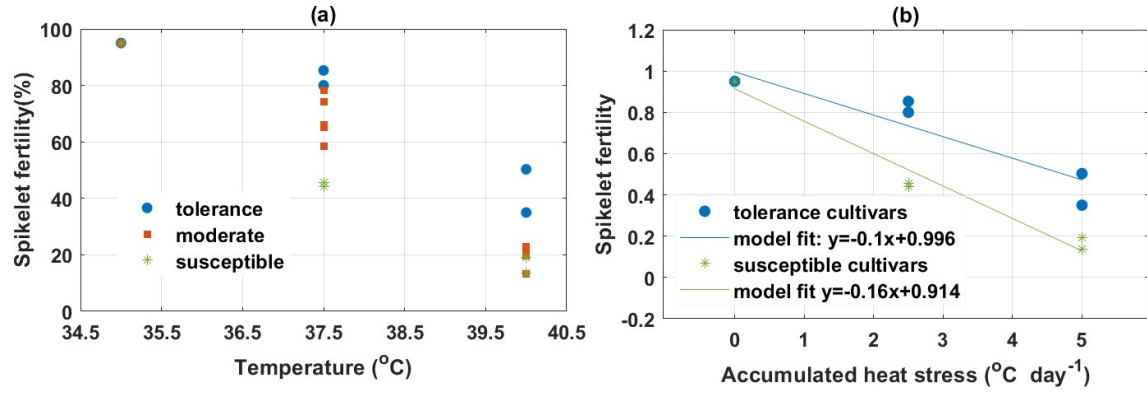

Figure S1: The measured response of spikelet fertility (%) to hourly temperature during anthesis for heat tolerant, moderate and susceptible cultivars as measured from Matsui et al. (2001), and (b) the modeled relationship between spikelet fertility ( $S_h$ , 0-1) to accumulated heat stress for heat tolerant and sensitive cultivars as simulated with main text equations (Eq(3) – Eq(4)). Red circles indicate observed values for heat tolerant cultivar and blue 'x' those for heat sensitive cultivars. Goodness of fit as shown.

Table S1: Data sources and experiments conducted in SPAR units used to evaluate different model versions. Experiments included three cultivars subjected to treatments with different day/night air temperature (T), CO<sub>2</sub> concentration, and/or paddy water temperatures. Some experiments were repeated with separate planting dates as indicated.

| Subspecies               | Variety                | Day/night | Year              | CO <sub>2</sub>                    | T <sup>1</sup> | Planting date      | Data sources    |
|--------------------------|------------------------|-----------|-------------------|------------------------------------|----------------|--------------------|-----------------|
|                          |                        | hours     |                   | (ppm)                              | (°C)           |                    |                 |
| <i>indica</i>            | IR30 <sup>3</sup>      | 14/10     | 1987              | 330                                | 31/31/27       | Jan 22             |                 |
|                          |                        |           | 1987              | 330                                | 31/31/27       | June 23            |                 |
|                          |                        |           | 1987              | 660                                | 31/31/27       | Jan 22             |                 |
|                          |                        |           | 1987              | 660                                | 31/31/27       | June 23            |                 |
|                          |                        |           | 1987 <sup>2</sup> | 160; 250;<br>330; 500;<br>600; 900 | 31/31/27       | Jan 22;<br>June 23 | [39, 41,<br>68] |
|                          |                        |           | 1989              | 330                                | 28/21/25       |                    |                 |
|                          |                        |           | 1989              | 660                                | 25/18/21       |                    | [37, 38]        |
|                          |                        |           | 1989              | 660                                | 28/21/25       | July 14            |                 |
|                          |                        |           | 1989              | 660                                | 34/27/31       |                    |                 |
|                          |                        |           | 1989              | 660                                | 37/30/34       |                    |                 |
| <i>tropical japonica</i> | Cocodrie <sup>3</sup>  | 15/9      | 1990              | 330                                | 28/21/25       | June 8             |                 |
|                          |                        |           | 1990              | 660                                | 28/21/25       |                    |                 |
|                          |                        |           | 2000              | 350                                | 28/28          |                    |                 |
|                          |                        |           | 2000              | 700                                | 24/24          |                    |                 |
|                          |                        |           | 2000              | 700                                | 28/28          | June 29            |                 |
|                          |                        |           | 2000              | 700                                | 32/32          |                    |                 |
|                          | Jefferson <sup>3</sup> | 15/9      | 2000              | 700                                | 36/36          |                    | [54]            |
|                          |                        |           | 2000              | 350                                | 28/28          |                    |                 |
|                          |                        |           | 2000              | 700                                | 24/24          |                    |                 |
|                          |                        |           | 2000              | 700                                | 28/28          | June 29            |                 |
|                          |                        |           | 2000              | 700                                | 32/32          |                    |                 |
|                          |                        |           | 2000              | 700                                | 36/36          |                    |                 |

<sup>1</sup>Expressed as average daily day/night air temperature and paddy water temperature where available.

<sup>2</sup>Data were used to assess C x T interactions.

<sup>3</sup>Planting densities were 235 plants m<sup>-2</sup> for IR30 and 36 plants m<sup>-2</sup> for Cocodrie and Jefferson. Facilities used to grow IR30 were direct sown into a large 2 m<sup>2</sup> soil bin while Cocodrie and Jefferson studies were sown into pots.

Table S2: Calibration values for cultivars IR30, Cocodrie, Jefferson, Wells, and CLXL753. Values for IR30, Cocodrie, and Jefferson were obtained from the 1988 experiment at University of Florida, and Cocodrie from the 28 and 24°C ambient CO<sub>2</sub> treatments conducted at USDA-ARS (Table 1). Values for Wells and CLXL753 were obtained from a single year with multiple planting dates in 2013 in Arkansas. Leaf gas exchange parameters  $V_{\text{cmax}}$ ,  $J_{\text{max}}$ , and  $T_p$  were obtained from Li et al. [36] and assumed constant for all cultivars.

| Coefficient                                               | Cultivar  |                     |            |            |
|-----------------------------------------------------------|-----------|---------------------|------------|------------|
|                                                           | IR30      | Cocodrie/Jefferson* | Wells      | CXL753     |
| DVR <sub>f</sub>                                          | 0.0180556 | 0.025               | 0.0158537  | 0.0158537  |
| DVR <sub>t</sub>                                          | 0.0180556 | 0.025               | 0.0158537  | 0.0158537  |
| DVR <sub>p</sub>                                          | 0.0134615 | 0.0152174           | 0.0125000  | 0.0125000  |
| DVR <sub>R</sub>                                          | 0.0285714 | 0.0344828           | 0.02500000 | 0.02500000 |
| SPGF (number kg <sup>-1</sup> )                           | 41000     | 41000               | 41348      | 50000      |
| Base cardinal temperature for leaf area growth (°C)       | 12        | 10                  | 10         | 10         |
| Critical temperature for spikelet fertility (°C)          | 33.5      | 33                  | 33.7       | 34.2       |
| $V_{\text{cmax}}$ (μmol m <sup>-2</sup> s <sup>-1</sup> ) |           | 132 – 47**          |            |            |
| $J_{\text{max}}$ (μmol m <sup>-2</sup> s <sup>-1</sup> )  |           | 146 – 50**          |            |            |
| $T_p$ (μmol m <sup>-2</sup> s <sup>-1</sup> )             |           | 0.25 – 9.6**        |            |            |

\* Same calibration values were obtained for Cocodrie and Jefferson cultivars.

\*\* Value varies with rice developmental stage.

Table S3: Correlation coefficients from linear regression between simulated yield versus cumulative growing season solar radiation and for different phenological stage durations for the five cultivars.

| Cultivars                    | Variables                            | ORYZA-V1 | ORYZA-V2 | ORYZA-V3 |
|------------------------------|--------------------------------------|----------|----------|----------|
| CLXL753                      | Solar radiation                      | 0.39     | 0.73**   | 0.72**   |
|                              | Duration from emergency to maturity  | 0.45     | 0.32     | 0.36     |
|                              | Duration from emergency to flowering | 0.61**   | 0.73**   | 0.78**   |
|                              | Duration from flowering to maturity  | -0.30    | -0.69**  | -0.74**  |
| Wells                        | Solar radiation                      | 0.30     | 0.58*    | 0.56*    |
|                              | Duration from emergency to maturity  | 0.36     | 0.15     | 0.09     |
|                              | Duration from emergency to flowering | 0.53*    | 0.62**   | 0.58*    |
|                              | Duration from flowering to maturity  | -0.31    | -0.79**  | -0.80**  |
| IR30, Cocodrie, Jefferson*** | Solar radiation                      | 0.26     | 0.25     | 0.22     |
|                              | Duration from emergency to maturity  | -0.07    | -0.20    | -0.32    |
|                              | Duration from emergency to flowering | -0.26    | -0.38    | -0.41    |
|                              | Duration from flowering to maturity  | 0.13     | 0.08     | -0.02    |

\* Correlation was significant with  $p < 0.05$ .

\*\* Correlation was significant with  $p < 0.01$ .

\*\*\* IR30, Cocodrie, and Jefferson results were combined for this assessment.
